1 **Reduced variation in *Wolbachia* density of larval stages in comparison with**  
2 **adults of *Onchocerca volvulus*: implications for clinical outcome of infection?**

3

4 Samuel Armoo<sup>1</sup>, Stephen R Doyle<sup>2</sup>, Shannon M Hedtke<sup>3</sup>, Gilles A Adjami<sup>4</sup>, Daniel A  
5 Boakye<sup>4</sup>, Annette C Kuesel<sup>5</sup>, Mike Y Osei-Atweneboana<sup>1</sup>, Warwick N Grant<sup>3</sup>

6

7 <sup>1</sup>Biomedical and Public Health Research Unit, Council for Scientific and Industrial  
8 Research - Water Research Institute, GA038, Council Close, Accra, Ghana

9 <sup>2</sup>Wellcome Sanger Institute, Hinxton, Cambridgeshire, CB10 1SA, United Kingdom

10 <sup>3</sup>Department of Animal, Plant and Soil Sciences, School of Life Sciences, La Trobe  
11 University, Bundoora 3083, Victoria, Australia

12 <sup>4</sup>The Expanded Special Project for Elimination of Neglected Tropical Diseases,  
13 Ouagadougou, Burkina Faso

14 <sup>5</sup>UNICEF/ UNDP/ World Bank/ WHO Special Programme for Research and Training  
15 in Tropical Disease, WHO, Geneva 1211, Switzerland.

16

17 SKA: [samuel.k.armoo@gmail.com](mailto:samuel.k.armoo@gmail.com)

18 SRD: [sd21@sanger.ac.uk](mailto:sd21@sanger.ac.uk)

19 SMH: [shannon.hedtke@gmail.com](mailto:shannon.hedtke@gmail.com)

20 GAA: [adjami78@hotmail.com](mailto:adjami78@hotmail.com)

21 DAB: [DBoakye@noguchi.ug.edu.gh](mailto:DBoakye@noguchi.ug.edu.gh)

22 ACK: [kuesela@who.int](mailto:kuesela@who.int)

23 MYO-A: [oseiatweneboana@yahoo.co.uk](mailto:oseiatweneboana@yahoo.co.uk)

24 WNG: [w.grant@latrobe.edu.au](mailto:w.grant@latrobe.edu.au)

25

26 **Abstract**

27 **Background:** *Wolbachia* are important endosymbionts of filarial parasites. The  
28 *Wolbachia* of *Onchocerca volvulus*, the filarial pathogen responsible for the human  
29 disease onchocerciasis, is implicated in the immunopathology of the disease and may  
30 be associated with disease severity dependent on the density of *Wolbachia*. However,  
31 little is known in regards to the density and heterogeneity of *Wolbachia* in  
32 microfilariae, the life stage that is thought to be responsible for the pathology.

33 **Results:** We used a real-time qPCR relative copy number assay to estimate the  
34 number of *Wolbachia* genome(s) per nuclear genome of skin microfilariae (Mf),  
35 vector L1 and iL3, and nodulectomy adult male and female *O. volvulus* worms  
36 sampled in Ghana and the Democratic Republic of the Congo. Relatively low median  
37 *Wolbachia* copy numbers and variation was observed in the Mf and vector stages, in  
38 contrast to significantly higher median and more variable *Wolbachia* copy number  
39 from the iL3 stage to the adult worm stages.

40 **Conclusions:** This study provides the first insight into variation in *Wolbachia* density  
41 between the major life stages of the parasite. The relatively invariant ratios observed  
42 for Mf and vector stages is in strong contrast to the high degree of variability of  
43 *Wolbachia* to nuclear ratios in adults and may indicate that the mutualistic  
44 relationship between the nematode and *Wolbachia* in these earlier stages is regulated  
45 differently, and certainly more stringently, than the relationship in adults.

46

## 47 **Background**

48 The human disease onchocerciasis, caused by the filarial nematode *Onchocerca*  
49 *volvulus*, remains a significant public health problem in Sub-Saharan Africa. The  
50 immunopathology associated with the disease, which includes dermatitis and keratitis,  
51 has been linked to a *Wolbachia* endosymbiont that is immunologically recognised by  
52 the host upon the death of microfilaria [1, 2, 3]. Evidence of this includes the  
53 initiation of keratitis by *Wolbachia* antigens in a murine model [1], and a significantly  
54 higher proportion of *Wolbachia* DNA in the sera from patients following treatment  
55 with either diethyl carbamazine or ivermectin [3]. The association between *Wolbachia*  
56 and pathology has been extended to suggest that *Wolbachia* density in adult worms is  
57 positively correlated with the incidence of blindness [4]. This hypothesis was based  
58 on measurements that compared *Wolbachia* copy number from “forest ecotype” and  
59 “savannah ecotype” *O. volvulus* that are associated with low blindness rates and low  
60 *Wolbachia* density, or higher blindness and higher *Wolbachia* densities, respectively.  
61 However, using larger and geographically diverse cohort of adult *O. volvulus*  
62 samples, we recently demonstrated using qPCR that the *Wolbachia* copy number  
63 ranges over one thousand fold in adult worms, and differs within and between  
64 sampling locations independent of the “forest” and “savannah” ecotype [5]. These  
65 results, therefore, did not support the original hypothesis that *Wolbachia* copy number  
66 in adult worms is associated with ocular pathology.

67

68 Much of the evidence supporting a leading role for *Wolbachia* as a driver of  
69 onchocerciasis pathology comes from *in vitro* experiments using adult worm extracts.  
70 However, both the chronic inflammation of the skin and eyes and the acute Mazzotti  
71 reaction pathology are due to release of material from dying microfilaria. Any

72 correlation between *Wolbachia* and pathology (including a correlation with  
73 *Wolbachia* density) must, therefore, be supported by appropriate data on microfilarial  
74 *Wolbachia*. We report here a comparison of *Wolbachia* density, measured by qPCR,  
75 in skin microfilaria, infective larvae and adult parasites, and show that the density in  
76 skin microfilaria is low and relatively constant, in contrast to a higher and more  
77 variable *Wolbachia* density in adult worms. This observation further supports a view  
78 that variation in pathology is unlikely to be influenced strongly by variation in  
79 *Wolbachia* density in adult worms.

80

## 81 **Results**

82 The life-stage-specific distribution of *Wolbachia* copy numbers in field isolates of *O.*  
83 *volvulus* is presented in Figure 1. The Mf and larval stages were characterised by  
84 relatively low *Wolbachia* copy numbers ratios and low variation between samples.  
85 The median *Wolbachia* copy number ratio for Mf was 0.18 (range = 0.07 to 0.54;  
86 Table 1), whereas the median for the L1 stage was 0.15 (range = 0.04 to 0.53; Table  
87 1). With regards to the infective larval stage, the median *Wolbachia* copy number  
88 ratio was 0.35 (range = 0.04 to 0.89; Table 1). Pairwise Wilcoxon rank sum tests  
89 between life cycle stages (Table 2) showed no significant differences in the  
90 distribution of *Wolbachia* copy number ratios between the Mf and the iL3 stages ( $P =$   
91 0.1705); Mf and L1 stages ( $P = 0.7047$ ); and the L1 and iL3 stages ( $P = 0.3286$ ).  
92 There was a significant increase in the median *Wolbachia* copy number from the iL3  
93 stage to the adult stage for both males (approximately 18-fold increase; Figure 1;  
94 Table 2;  $P = 0.0035$ ), and females (about 15-fold increase; Figure 1; Table 2;  $P =$   
95 0.0015), although the distributions of copy number overlapped across all life stages  
96 (i.e. Table 1: the upper limits of the copy number range for the larval stages

97 overlapping with the lower limits of the copy number range for the adult stages). The  
98 median *Wolbachia* copy number ratios were similar between adult male and female  
99 *O. volvulus* isolates (Figure 1; Table 2;  $P = 0.8315$ ), and their distributions did not  
100 differ stochastically based on a Wilcoxon rank sum test (or Mann-Witney U test;  
101 Table 2). However, there was significantly higher variation in *Wolbachia* copy  
102 number within adult male and female field isolates of *O. volvulus* compared to earlier  
103 life stages (Figure 1; Table 1; Table 2). *Wolbachia* copy numbers in adult male field  
104 isolates of *O. volvulus* ranged from 0.03 to 68.35, whereas those in adult female  
105 isolates ranged from 0.29 to 76.77 (Table 1).

106

107 <Insert Figure 1 here>

108

109 <Insert Table 1 here>

110

111 <Insert Table 2 here>

112

### 113 **Discussion**

114 In this study, we compared the relative copy number and heterogeneity of *Wolbachia*  
115 between larval and adult stages of *O. volvulus* from several sampling locations in  
116 central Ghana and the north-eastern region of the DRC. The homogeneous  
117 distribution of *Wolbachia* copy number in the Mf and larval stages of *O. volvulus*  
118 observed here is consistent with the findings recorded in *B. malayi* [6, 7, 8]. Electron  
119 microscopy studies have revealed that just a few cells of the Mf and larval stages of *B.*  
120 *malayi* contained sparsely distributed *Wolbachia* [8, 9].

121

122 In contrast to the homogeneous distribution of *Wolbachia* in Mf and larval stages,  
123 there was significantly greater variability in the copy number variation in both adult  
124 male and female worms, consistent with the findings of Armoo and colleagues [5],  
125 despite using a different set of adult male and female *O. volvulus* field isolates.  
126 Armoo and colleagues [5] used a qPCR assay to measure *Wolbachia* copy numbers in  
127 individual adult male and female worms sampled from four countries in West Africa  
128 (Togo, Ghana, Côte d'Ivoire and Mali), and detected significant within-population  
129 variation of *Wolbachia* copy numbers.

130

131 There are several possible explanations for variation in *Wolbachia* density between  
132 the life stages. Assuming that *Wolbachia* provide essential metabolites to the worm  
133 [10], the low and relatively homogeneous density of *Wolbachia* within all the larval  
134 stages could be explained by relatively low metabolic demands of early stage larvae,  
135 with a much smaller biomass and no reproductive tissues compared to an adult worm.  
136 Therefore the larval stages would likely require less from the mutualistic relationship  
137 than a large, reproductively active adult.

138

139 It is less clear how to account for the 100 – 1000 fold range in apparent *Wolbachia*  
140 density between individual adults, and the absence of this variability in microfilaria  
141 and larval stages. If the primary driver of the mutualistic relationship between worms  
142 and bacteria is metabolic [10, 11, 12], then this range implies either that adult worms  
143 can tolerate very variable levels of the metabolites they obtain from the bacteria  
144 without deleterious perturbation of their metabolism, or, that the metabolic rates of  
145 adult worms is variable. In the latter case (variation in adult worm metabolic rate),  
146 and *Wolbachia* density is coupled strongly to the adults' metabolic rate, then variation

147 in *Wolbachia* density implies that the bacteria are able to respond dynamically to the  
148 worms' demand for metabolites. Preliminary genome wide association analysis of the  
149 *Wolbachia* and the worm nuclear genome did not reveal any obvious association of  
150 particular worm or bacterial genomes with high or low density, suggesting that the  
151 ratio of *Wolbachia* to nuclear genomes is not a genetically determined trait (Hedtke &  
152 Doyle, unpublished).

153

154 Although this study does not include data on the disease status of infected individuals  
155 from whom the Mf samples were obtained, the Mf analysed were from the north-east  
156 of the DRC, a region that is largely savannah and in which there is onchocerciasis  
157 associated blindness. The L1 and infective larvae samples were from central Ghana,  
158 which is also largely savannah and where there is also onchocerciasis-associated  
159 blindness. The low and homogeneous distribution of *Wolbachia* in the Mf and other  
160 larval stages may suggest that disease pathology or ecotype of the parasite may not be  
161 positively correlated with *Wolbachia* density in individual Mf.

162

## 163 **Conclusions**

164 The similarity of the data presented in this report with data on *Wolbachia* densities in  
165 the related filarial pathogen, *B. malayi*, suggests that the regulation of *Wolbachia*  
166 copy number across life stages is evolutionary conserved and likely represents similar  
167 mutualistic strategies by the two parasites at similar stages of the life cycle. However,  
168 the mechanism(s) by which this regulation occurs, and the tolerance for significant  
169 variation, especially in the adult stages of the parasite, warrants further investigations.  
170 Understanding this regulation may be important in the context of anti-*Wolbachia*  
171 therapies that aim to kill adult parasites by depleting their *Wolbachia*. For example, an

172 adult with very low *Wolbachia* density and hence presumably low demand for  
173 *Wolbachia* metabolites, may be less sensitive to depletion of the *Wolbachia*.  
174 Likewise, *Wolbachia* at low density may be in a less metabolically active state that  
175 may decrease their sensitivity to antibiotics that target metabolic processes such as  
176 protein translation (the target of doxycycline antibiotics). Furthermore, understanding  
177 the regulation of what may be an active, dynamic regulation of *Wolbachia* density  
178 may offer new insight into novel drug targets to disrupt the mutualistic relationship  
179 between the bacteria and its worm.  
180  
181



## 182 **Methods**

### 183 ***O. volvulus* Samples**

184 We used archival field parasite samples that were collected from central Ghana and  
185 north-eastern region of the Democratic Republic of the Congo. These field samples  
186 included 30 each of adult female and male *O. volvulus* worms, six first stage (L1) and  
187 ten infective third stage (iL3) larvae from three endemic communities in Ghana  
188 (Kyingakrom: latitude 8.0988; longitude -2.1090; Jagbengbendo: latitude 8.3342;  
189 longitude -0.1256; and Asubende: latitude 8.0171; longitude -0.9596). These samples  
190 from Ghana were collected from communities that were mainly found in the largely  
191 Savannah, and forest-Savannah transition zones. Therefore these parasites could be  
192 classified as “savannah ecotype”. In addition, we used 24 pools (each containing five  
193 individuals) of *O. volvulus* microfilariae (Mf) that were sampled from Lufu in the  
194 Democratic Republic of the Congo (latitude -5.68446; longitude 13.91585). Lufu is  
195 located within the Savannah, therefore could be classified as Savannah ecotype.

196

197 The archived L1 and iL3 larvae were previously isolated from the midgut and head  
198 region of blackfly vectors, respectively. The Biomedical and Public Health Research  
199 Unit of the Council for Scientific and Industrial Research (Accra, Ghana) carried out  
200 the field blackfly sampling. The same team isolated both adult male and female stages  
201 of *O. volvulus* after surgical removal of nodules from infected individuals in three  
202 endemic communities in central Ghana. The Mf were isolated from the skin snips  
203 (average weight of 1 mg) that had been taken from the iliac crest of infected  
204 individuals using the Holth-type corneoscleral punch. The Expanded Special Project  
205 for Elimination of Neglected Tropical Diseases, Ouagadougou, Burkina Faso, did  
206 sampling and archiving of Mf as a part of routine surveillance activities.

207

208 DNA was isolated from individual adult worms using the Bioline Isolate II genomic  
209 DNA extraction kit (Bioline, Sydney, Australia) following the manufacturer's  
210 protocol. Individual L1 and iL3 worms and pools of MF were lysed in a 20 µl solution  
211 from a master mix of 98.5 µl of DirectPCR™ lysis reagent (MouseTail; Viagen  
212 Biotech, Los Angeles, USA) and 1.5 µl of 20 mg/ml Proteinase K stock (Roche  
213 Diagnostics GmbH, Mannheim, Germany) as previously described [13].

214

### 215 **Real-time qPCR *Wolbachia* Copy Number Assay**

216 The relative *Wolbachia* copy number for each worm DNA extract was determined  
217 using a real-time qPCR assay designed and used previously [5]. In summary, the  
218 assay was designed based on two single copy genes in the *Wolbachia* and nematode  
219 genomes: the *Wolbachia* surface (*wsp*) gene (GenBank: HG810405.1) and the  
220 glutathione reductase (*gr*) gene (GenBank: Y11830.1) of the nematode. The sequence  
221 of the *wsp* targeting primers were forward: AACCGGGACAAAAAGAAGAG;  
222 reverse: CAGCAACCTACCAAAGATGGA, and that for the *gr* targeting primers  
223 were forward: GTGCGACGAAGAAGGATTTC; reverse:  
224 GCTTATGCTGTTTCGGGTTT.

225

226 Each qPCR reaction mixture (a total volume of 10 µl) consisted of 0.2 pmoles/µl of  
227 each primer, 2 µl of DNA and 5 µl of SsoAdvanced™ Universal SYBR® Green  
228 Supermix (Bio-Rad Laboratories Inc., California, USA). All runs were performed in  
229 duplicate on the CFX 96 Real-Time PCR Detection System (Bio-Rad Laboratories  
230 Inc., California, USA), using the following thermal protocol: 95 °C for 2 min,  
231 followed by 40 cycles of 95°C for 5 sec, 53.8°C for 15 sec and 72°C for 15 sec. As a

232 quality control measure, melt curves were generated at the end of each qPCR run to  
233 ensure specificity of primers.

234

235 The quantification cycles (C<sub>q</sub>) of all qPCR runs were automatically generated by the  
236 CFX Manager Software v 3.1 (Bio-Rad Laboratories Inc., California, USA), and used  
237 to determine relative *Wolbachia* copy number of each sample as done elsewhere [5].

238

### 239 **Statistical Analyses**

240 Data entry and re-formatting were performed using Microsoft Excel (2011). Wilcoxon  
241 rank sum tests (W) were performed using the R programming language, version 3.2.2  
242 [14].

243

244

245

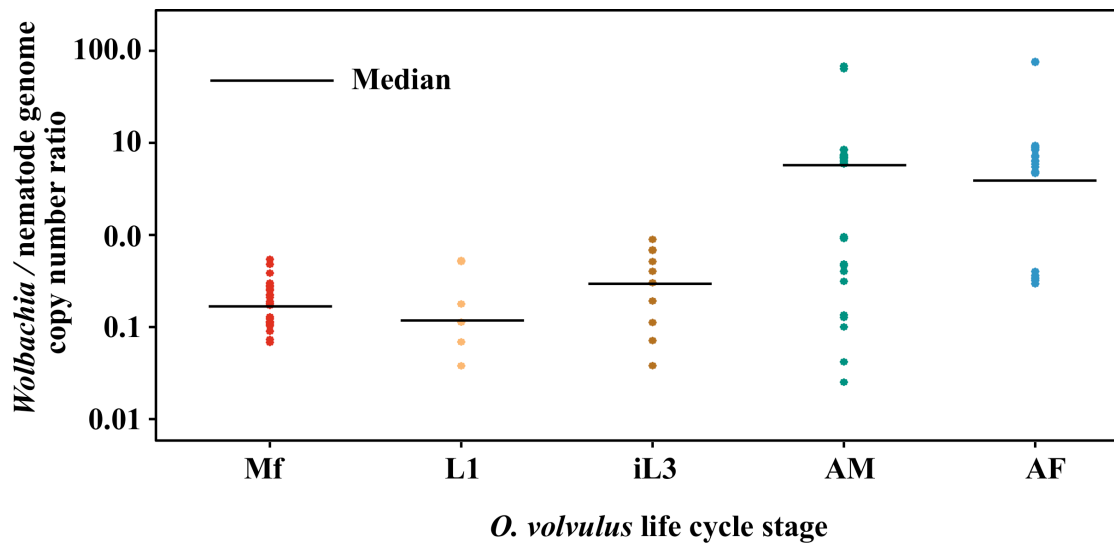

246

247 **Figure 1:** The density of *Wolbachia* (presented as *Wolbachia* / nematode genome

248 copy number ratio) compared among different life stages of *Onchocerca volvulus*.

249 The scatter plots show the distribution of *Wolbachia* copy numbers with each life

250 stage. The black lines indicate the median values for each life stage. The plots are

251 colour-coded to correspond with different life stages. Mf = microfilariae, L1 = first

252 stage larvae, iL3 = infective stage three larvae, AM = adult males, AF = adult

253 females.

254

255

256

257 **Table 1:** The median and range of *Wolbachia* copy number ratios of five *O. volvulus*

258 life stages. Mf = microfilariae, L1 = first stage larvae, iL3 = infective stage three

259 larvae, AM = adult males, AF = adult females

| <i>O. volvulus</i> life cycle stage | <i>Wolbachia</i> / nematode genome copy number ratio |               |
|-------------------------------------|------------------------------------------------------|---------------|
|                                     | Median                                               | Range         |
| Mf                                  | 0.18                                                 | 0.07 to 0.54  |
| L1                                  | 0.15                                                 | 0.04 to 0.53  |
| iL3                                 | 0.35                                                 | 0.04 to 0.89  |
| AM                                  | 6.40                                                 | 0.03 to 68.35 |
| AF                                  | 5.18                                                 | 0.29 to 76.77 |

260

261

262 **Table 2:** P-values based on Wilcoxon rank sum tests for differences in *Wolbachia*

263 density distributions between life stages. Mf = microfilariae, L1 = first stage larvae,

264 iL3 = infective stage three larvae, AM = adult males, AF = adult females.

|                                                |     | <i>Onchocerca volvulus</i> life cycle stage |         |         |        |
|------------------------------------------------|-----|---------------------------------------------|---------|---------|--------|
|                                                |     | Mf                                          | L1      | iL3     | AM     |
| <i>Onchocerca volvulus</i><br>life cycle stage | L1  | 0.7047                                      | -       | -       | -      |
|                                                | iL3 | 0.1705                                      | 0.3286  | -       | -      |
|                                                | AM  | 2.9e <sup>-6</sup> *                        | 0.0075* | 0.0035* | -      |
|                                                | AF  | 1.0e <sup>-11</sup> *                       | 0.0016* | 0.0015* | 0.8315 |

265 \* P < 0.05

266

267

268

269 **Declarations**

270 **Ethics approval and consent to participate**

271 The DNA samples were obtained from archived parasite materials that were obtained  
272 from field studies by the Biomedical and Public Health Research Unit of the CSIR-  
273 Water Research Institute; and The Expanded Special Project for Elimination of  
274 Neglected Tropical Diseases. The Institutional Review Board of CSIR granted ethical  
275 clearance for CSIR team, and the WHO African Programme for Onchocerciasis  
276 Control covered the Expanded Special Project for Elimination of Neglected Tropical  
277 Diseases

278

279 **Consent for publication**

280 All authors read, approved the final version of the manuscript and have consented to  
281 its submission to Parasites & Vectors for publication.

282

283 **Availability of data and material**

284 All relevant data are included in the manuscript. Experimental materials are available  
285 from the corresponding author on request.

286

287 **Competing interests**

288 The authors declare that they have no competing interests

289

290 **Funding**

291 This study received financial support from TDR - the Special Programme for  
292 Research and Training in Tropical Diseases, co-sponsored by UNICEF, UNDP, The  
293 World Bank and WHO.

294

295 **Authors' contributions**

296 **Conceptualization:** Warwick N Grant, Stephen R Doyle, Samuel Armoo

297 **Investigation:** Samuel Armoo, Shannon M. Hedtke

298 **Methodology:** Samuel Armoo, Stephen R Doyle, Warwick N Grant

299 **Resources:** Mike Y Osei-Atweneboana, Daniel A Boakye, Gilles A Adjami, Stephen

300 R Doyle, Warwick N Grant

301 **Data analysis:** Samuel Armoo

302 **Supervision:** Warwick N Grant, Stephen R Doyle, Annette C Kuesel, Mike Y Osei-

303 Atwenebonana

304 **Writing** – original draft: Samuel Armoo.

305 **Writing – review & editing:** Samuel Armoo, Stephen R Doyle, Shannon M Hedtke,

306 Gilles A Adjami, Daniel A Boakye, Annette C Kuesel, Mike Y Osei-Atweneboana,

307 Warwick N Grant

308

309 **Acknowledgements**

310 The authors would like to thank the field team of the Biomedical and Public Health

311 Research Unit of the CSIR – Water Research Institute, and the Expanded Special

312 Project for Elimination of Neglected Tropical Diseases.

313

## 314 References

- 315 1. Saint Andre A, Blackwell NM, Hall LR, Hoerauf A, Brattig NW, Volkmann  
316 L, et al. The role of endosymbiotic *Wolbachia* bacteria in the pathogenesis of  
317 river blindness. *Science*. 2002;295 5561:1892-5; doi:  
318 10.1126/science.1068732. <http://www.ncbi.nlm.nih.gov/pubmed/11884755>.
- 319 2. Brattig NW. Pathogenesis and host responses in human onchocerciasis: impact  
320 of *Onchocerca* filariae and *Wolbachia* endobacteria. *Microbes and infection /*  
321 *Institut Pasteur*. 2004;6 1:113-28.  
322 <http://www.ncbi.nlm.nih.gov/pubmed/14738900>.
- 323 3. Keiser PB, Reynolds SM, Awadzi K, Ottesen EA, Taylor MJ, Nutman TB.  
324 Bacterial endosymbionts of *Onchocerca volvulus* in the pathogenesis of post-  
325 treatment reactions. *J Infect Dis*. 2002;185 6:805-11; doi: 10.1086/339344.  
326 <http://www.ncbi.nlm.nih.gov/pubmed/11920298>.
- 327 4. Higazi TB, Filiano A, Katholi CR, Dadzie Y, Remme JH, Unnasch TR.  
328 *Wolbachia* endosymbiont levels in severe and mild strains of *Onchocerca*  
329 *volvulus*. *Mol Biochem Parasitol*. 2005;141 1:109-12; doi:  
330 10.1016/j.molbiopara.2005.02.006.  
331 <http://www.ncbi.nlm.nih.gov/pubmed/15811532>.
- 332 5. Armoo S, Doyle SR, Osei-Atweneboana MY, Grant WN. Significant  
333 heterogeneity in *Wolbachia* copy number within and between populations of  
334 *Onchocerca volvulus*. *Parasit Vectors*. 2017;10 1:188; doi: 10.1186/s13071-  
335 017-2126-4. <http://www.ncbi.nlm.nih.gov/pubmed/28420428>.
- 336 6. Fenn K, Blaxter M. Quantification of *Wolbachia* bacteria in *Brugia malayi*  
337 through the nematode lifecycle. *Mol Biochem Parasitol*. 2004;137 2:361-4.  
338 <http://www.ncbi.nlm.nih.gov/pubmed/15383308>.



- 339 7. McGarry HF, Egerton GL, Taylor MJ. Population dynamics of *Wolbachia*  
340 bacterial endosymbionts in *Brugia malayi*. Mol Biochem Parasitol. 2004;135  
341 1:57-67. <http://www.ncbi.nlm.nih.gov/pubmed/15287587>.
- 342 8. Fischer K, Beatty WL, Jiang D, Weil GJ, Fischer PU. Tissue and stage-  
343 specific distribution of *Wolbachia* in *Brugia malayi*. PLoS Negl Trop Dis.  
344 2011;5 5:e1174. <http://www.ncbi.nlm.nih.gov/pubmed/21629728>.
- 345 9. Landmann F, Slatko B, Foster JM, Sullivan W. Asymmetric *Wolbachia*  
346 segregation during early *Brugia malayi* embryogenesis determines Its  
347 distribution in adult host tissues. PloS Negl Trop Dis. 2010;4 7; doi: ARTN  
348 e758  
349 10.1371/journal.pntd.0000758. <Go to ISI>://WOS:000280412300026.
- 350 10. Ghedin E, Wang S, Spiro D, Caler E, Zhao Q, Crabtree J, et al. Draft genome  
351 of the filarial nematode parasite *Brugia malayi*. Science. 2007;317 5845:1756-  
352 60; doi: 10.1126/science.1145406.  
353 <http://www.ncbi.nlm.nih.gov/pubmed/17885136>.
- 354 11. Foster J, Ganatra M, Kamal I, Ware J, Makarova K, Ivanova N, et al. The  
355 *Wolbachia* genome of *Brugia malayi*: endosymbiont evolution within a human  
356 pathogenic nematode. PLoS biology. 2005;3 4:e121; doi:  
357 10.1371/journal.pbio.0030121.  
358 <http://www.ncbi.nlm.nih.gov/pubmed/15780005>.
- 359 12. Cotton JA, Bennuru S, Grote A, Harsha B, Tracey A, Beech R, et al. The  
360 genome of *Onchocerca volvulus*, agent of river blindness. Nat Microbiol.  
361 2016;2:16216; doi: 10.1038/nmicrobiol.2016.216.  
362 <http://www.ncbi.nlm.nih.gov/pubmed/27869790>.

- 363 13. Doyle SR, Armoo S, Renz A, Taylor MJ, Osei-Atweneboana MY, Grant WN.  
364 Discrimination between *Onchocerca volvulus* and *O. ochengi* filarial larvae in  
365 *Simulium damnosum* (s.l.) and their distribution throughout central Ghana  
366 using a versatile high-resolution speciation assay. Parasit Vectors. 2016;9  
367 1:536; doi: 10.1186/s13071-016-1832-7.  
368 <http://www.ncbi.nlm.nih.gov/pubmed/27724959>.
- 369 14. R Development Core Team. R: a language and environment for statistical  
370 computing. 2015.  
371
